# Supplementary material
Source: PubMed Central journal article supplement (PMC6668998)
Supplement: NIHMS1518157-supplement-2.pdf [file NIHMS1518157-supplement-2.pdf]

**Online Table 1: Current Procedural Terminology Billing Codes Used**

|                        |                                                           | CPT Codes                                                                                                                                                                                                          |
|------------------------|-----------------------------------------------------------|--------------------------------------------------------------------------------------------------------------------------------------------------------------------------------------------------------------------|
|                        | Eye clinic visit                                          | 92004, 92002, 92012, 92014; 99201-5*, 99211-5*, 99221-3*, 99231-3*, 99241-5*, 99251-5*, 99281-5*                                                                                                                   |
| Diagnostic procedures  | Perimetry                                                 | 92081, 92082, 92083                                                                                                                                                                                                |
| Diagnostic procedures  | Other ocular imaging (i.e., optical coherence tomography) | 92133, 92135                                                                                                                                                                                                       |
| Diagnostic procedures  | Fundus Photography                                        | 92250                                                                                                                                                                                                              |
| Diagnostic procedures  | Gonioscopy                                                | 92020                                                                                                                                                                                                              |
| Diagnostic procedures  | Any other diagnostic test                                 | 92015, 92018-9, 92060, 92065, 92070, 92100, 92120, 92130, 92136, 92140, 92225-6, 92230, 92235, 92240, 92260, 92254, 92270, 92275, 92238, 92284-7, 92310-7, 92325-6, 92340-2, 92352-5, 92355, 92358, 92370-1, 92499 |
| Therapeutic Procedures | Laser trabeculoplasty                                     | 65855                                                                                                                                                                                                              |
| Therapeutic Procedures | Laser peripheral iridotomy                                | 66761                                                                                                                                                                                                              |
| Therapeutic Procedures | Glaucoma drainage implant                                 | 66180                                                                                                                                                                                                              |
| Therapeutic Procedures | Trabeculectomy                                            | 66170, 66172                                                                                                                                                                                                       |
| Therapeutic Procedures | Cataract surgery                                          | 66830, 66840, 66850, 66852, 66920, 66930, 66940, 66982, 66983, 66984                                                                                                                                               |

\*These codes were included when submitted by an optometrist or ophthalmologist.

CPT = Current Procedural Terminology
